# Supplementary material for: The elusive ligand complexes of the DWARF14 strigolactone receptor
Source: PubMed Central journal article supplement (PMC5913616; doi:10.1093/jxb/ery036), 2018-01-31
Supplement: ery036_suppl_supplementary_material.pdf [file ery036_suppl_supplementary_material.pdf]

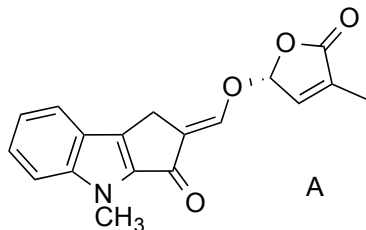

A

(*R,E*)-4-methyl-2-(((4-methyl-5-oxo-2,5-dihydrofuran-2-yl)oxy)methylene)-1,2-dihydrocyclopenta[*b*]indol-3(4*H*)-one

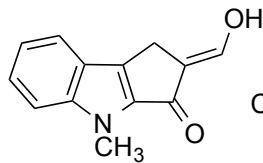

C

(*E*)-2-(hydroxymethylene)-4-methyl-1,2-dihydrocyclopenta[*b*]indol-3(4*H*)-one

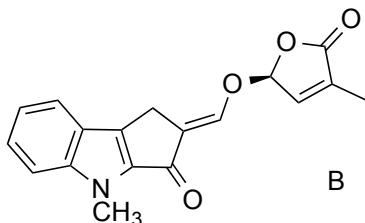

B

(*S,E*)-4-methyl-2-(((4-methyl-5-oxo-2,5-dihydrofuran-2-yl)oxy)methylene)-1,2-dihydrocyclopenta[*b*]indol-3(4*H*)-one

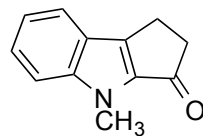

D

4-methyl-1,2-dihydrocyclopenta[*b*]indol-3(4*H*)-one

**Supplementary Figure S1.** Strigolactone analogues used in crystallisation experiments.

**Supplementary Figure S2.** Ligand binding cavity of *OsD14*, showing  $2mFo - DFc$  map contoured at  $1 \sigma$  (white), and  $mFo - DFc$  map contoured at  $3 \sigma$  (green) in (A) crystal D14 5-18, and (B) crystal D14 S147A.

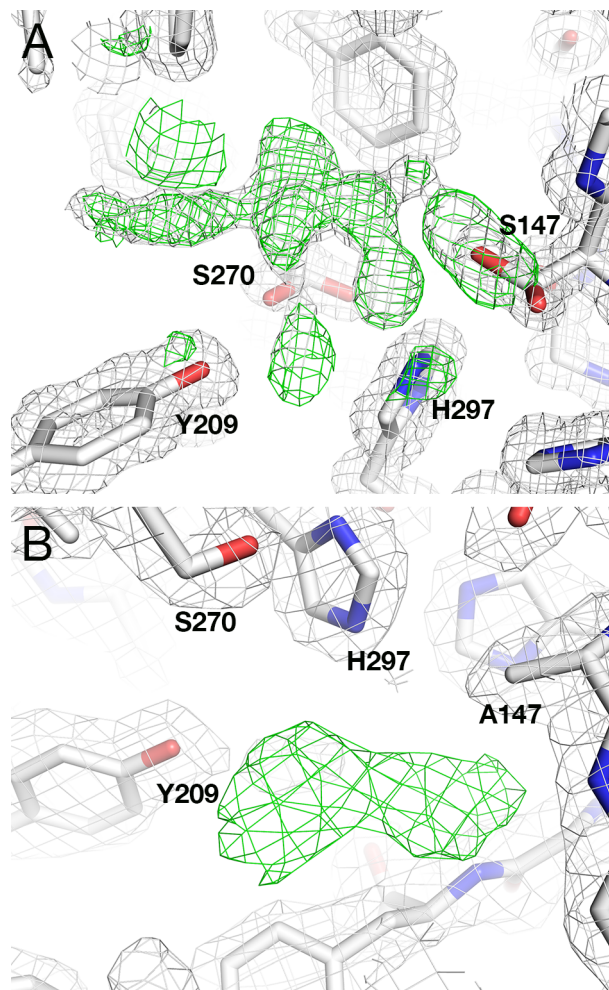

**Supplementary Table S1.** Data collection and refinement statistics for D14 ligand complex searches. Statistics for the highest-resolution shell are shown in parentheses.

| Crystal id.                        | D14 1-3<br>GR24 soaked            | D14 3-11<br>B soaked                   | D14 4-2<br>A co-cryst.                      | D14 5-18<br>C soaked                       | D14 S147A<br>C soaked                      |
|------------------------------------|-----------------------------------|----------------------------------------|---------------------------------------------|--------------------------------------------|--------------------------------------------|
| Crystallisation conditions         | 0.1 M Hepes pH 7.0, 10% PEG 6000  | 0.1 M Hepes pH 7.0, 20% PEG 6000       | 0.1 M Bis-Tris propane pH 6.5, 20% PEG 6000 | 0.1 M Bis-Tris propane pH 6.5, 8% PEG 6000 | 0.1 M Bis-Tris propane pH 6.5, 8% PEG 6000 |
| <b>Data collection</b>             |                                   |                                        |                                             |                                            |                                            |
| R.m.s.d. to 6elx (Å)               | 0.124                             | 0.258                                  | 0.325                                       | 0.145                                      | 0.561                                      |
| Wavelength                         | 0.93222                           | 0.97247                                | 0.87300                                     | 0.97625                                    | 0.87260                                    |
| Resolution range                   | 44.33 - 1.5<br>(1.554 - 1.5)      | 31.39 - 1.5<br>(1.554 - 1.5)           | 38.79 - 1.6<br>(1.657 - 1.6)                | 44.74 - 1.151<br>(1.192 - 1.151)           | 37.82 - 2.15<br>(2.227 - 2.15)             |
| Space group                        | $P2_12_12_1$                      | $P2_12_12_1$                           | $P2_12_12_1$                                | $P2_12_12_1$                               | $C2_1$                                     |
| Unit cell                          | 48.03 88.66 118<br>90.0 90.0 90.0 | 47.91 88.8<br>118.13<br>90.0 90.0 90.0 | 46.34 70.97<br>70.76<br>90 91.331 90.0      | 48.31 88.71<br>118.55<br>90.0 90.0 90.0    | 77.88 49.62<br>69.19<br>90.0 106.2 90.0    |
| Unique reflections                 | 80204 (7162)                      | 80438 (7525)                           | 59047 (5019)                                | 179744 (17385)                             | 13976 (1398)                               |
| Completeness (%)                   | 98.5 (88.6)                       | 98.7 (93.6)                            | 97.6 (83.0)                                 | 100.0 (96.0)                               | 99.75 (99.15)                              |
| $R_{\text{meas}}^a$                | 0.08148 (0.998)                   | 0.05603 (1.408)                        | 0.1153 (0.9698)                             | 0.1575 (0.9687)                            | 0.2062 (1.155)                             |
| Wilson B                           | 15.1                              | 20.1                                   | 13.4                                        | 13.4                                       | 32.5                                       |
| <b>Refinement</b>                  |                                   |                                        |                                             |                                            |                                            |
| No reflections in refinement       | 80204 (7162)                      | 80430 (7525)                           | 59033 (5012)                                | 159292 (15670)                             | 13960 (1395)                               |
| No reflections $R_{\text{free}}^b$ | 4012 (359)                        | 4027 (379)                             | 2002 (168)                                  | 7948(769)                                  | 698 (70)                                   |
| $R_{\text{work}}^b$                | 0.1792 (0.2835)                   | 0.1881 (0.3653)                        | 0.1776 (0.2977)                             | 0.1981 (0.2865)                            | 0.1826<br>(0.3121)                         |
| $R_{\text{free}}^c$                | 0.2052 (0.2988)                   | 0.2218 (0.3898)                        | 0.2105 (0.3512)                             | 0.2137 (0.2948)                            | 0.2500 (0.4056)                            |
| No. of atoms                       | 4830                              | 4868                                   | 4675                                        | 4988                                       | 2299                                       |
| Proteins                           | 4217                              | 4221                                   | 4259                                        | 4199                                       | 2089                                       |
| Ligands                            | 48                                | 21                                     | 18                                          | 16                                         | 54                                         |
| Waters                             | 317                               | 626                                    | 398                                         | 719                                        | 156                                        |
| Protein residues                   | 535                               | 535                                    | 535                                         | 534                                        | 268                                        |
| R.m.s.d. from ideal                |                                   |                                        |                                             |                                            |                                            |
| Bond lengths (Å)                   | 0.006                             | 0.006                                  | 0.006                                       | 0.005                                      | 0.008                                      |
| Bond angles (Å)                    | 1.12                              | 1.08                                   | 0.79                                        | 1.14                                       | 1.23                                       |
| Ramachandran analysis <sup>d</sup> |                                   |                                        |                                             |                                            |                                            |
| ..Favoured (%)                     | 98.0                              | 98.0                                   | 98.7                                        | 98.0                                       | 97.0                                       |
| Allowed (%)                        | 1.6                               | 2.0                                    | 1.3                                         | 2.2                                        | 3.0                                        |
| Outliers (%)                       | 0.36                              | 0.36                                   | 0.0                                         | 0.18                                       | 0.0                                        |
| Rotamer outliers (%)               | 0.87                              | 1.3                                    | 0.65                                        | 1.3                                        | 3.1                                        |
| Clashscore                         | 3.14                              | 2.92                                   | 1.04                                        | 3.90                                       | 7.86                                       |
| Average B-factor                   | 20.77                             | 27.74                                  | 16.39                                       | 19.22                                      | 25.60                                      |
| protein                            | 19.20                             | 26.15                                  | 15.51                                       | 17.31                                      | 24.97                                      |
| ligands                            | 38.50                             | 49.52                                  | 30.61                                       | 34.77                                      | 35.10                                      |
| solvent                            | 31.22                             | 37.74                                  | 25.22                                       | 29.32                                      | 30.79                                      |

<sup>a</sup> $R_{\text{meas}} = \sum_h \sum_l (n_h/n_l - 1)^{1/2} |I_{hl} - \langle I_h \rangle| / \sum_h \sum_l \langle I_h \rangle$  (Evans, 2006; Evans and Murshudov, 2013).

<sup>b</sup> $R_{\text{work}} = \sum_{hkl} |F_o| - |F_c| / \sum_{hkl} |F_o|$  where  $F_o$  and  $F_c$  are the observed and calculated structure factor amplitudes, respectively.

<sup>c</sup> $R_{\text{free}}$  calculated from a randomly chosen 5% of all unique reflections.

<sup>d</sup>From *MolProbity* (Chen *et al.*, 2010).
